# Supplementary figures and images for: Structural basis for Scc3-dependent cohesin recruitment to chromatin
Source: eLife journal article supplement (doi:10.7554/elife.38356), 2018-08-15

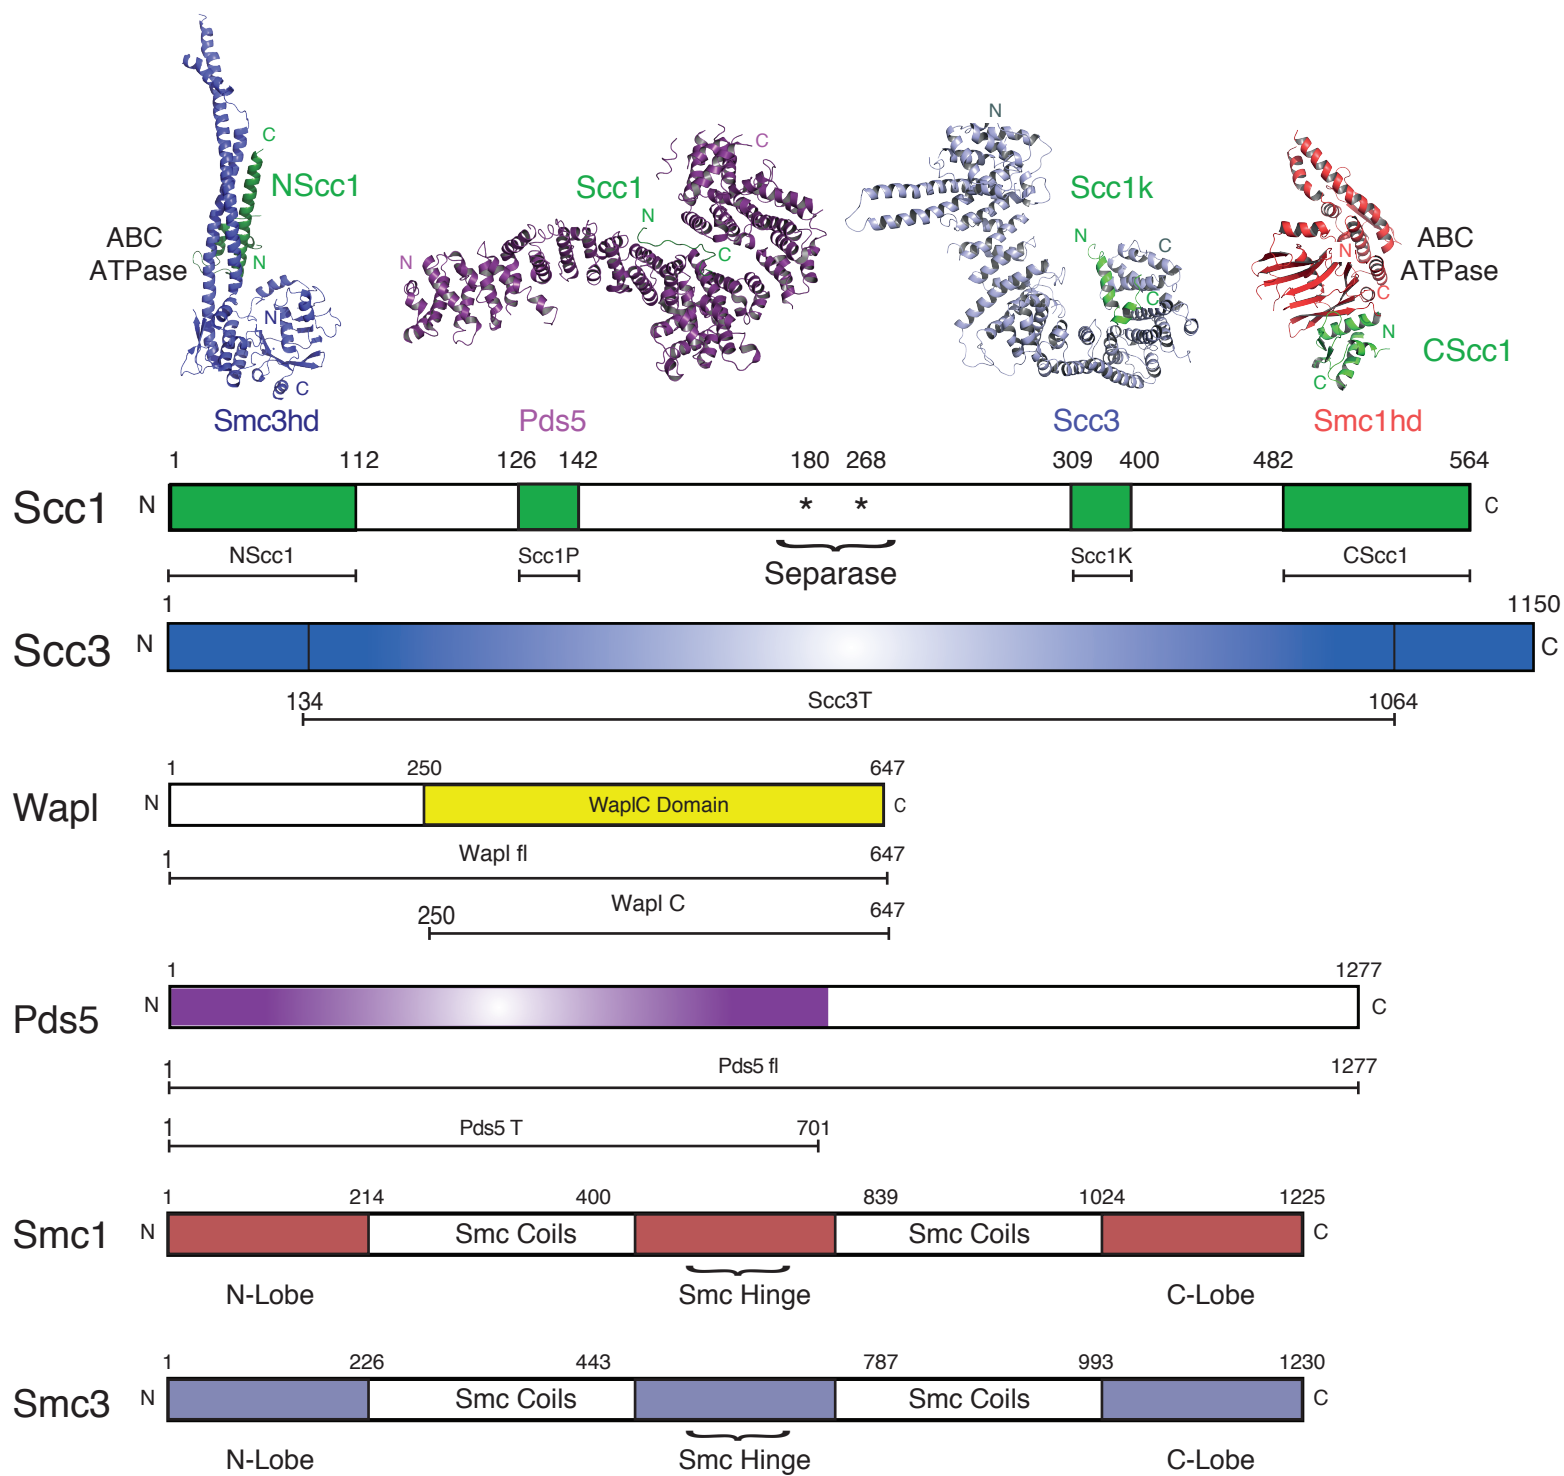

Supplement: supp [file elife-38356-supp-v1.zip]

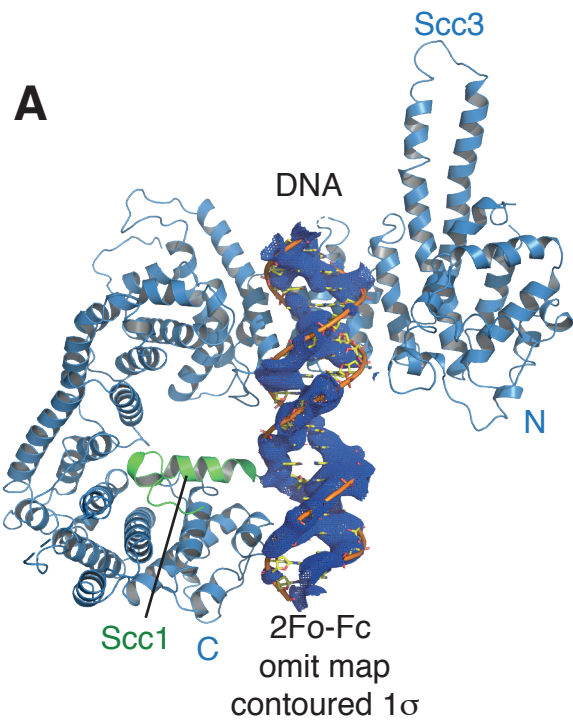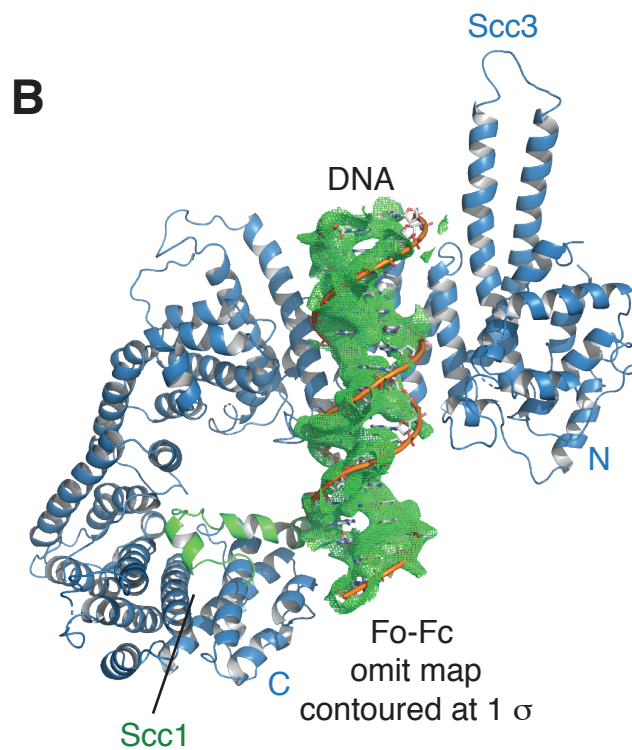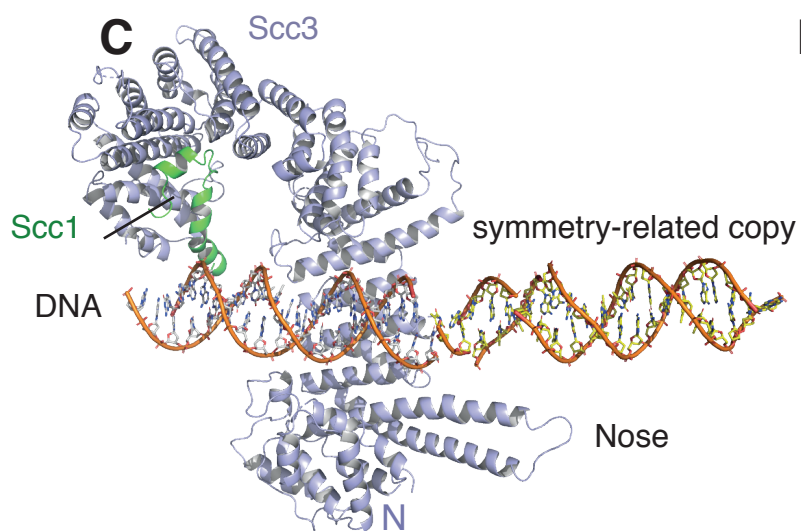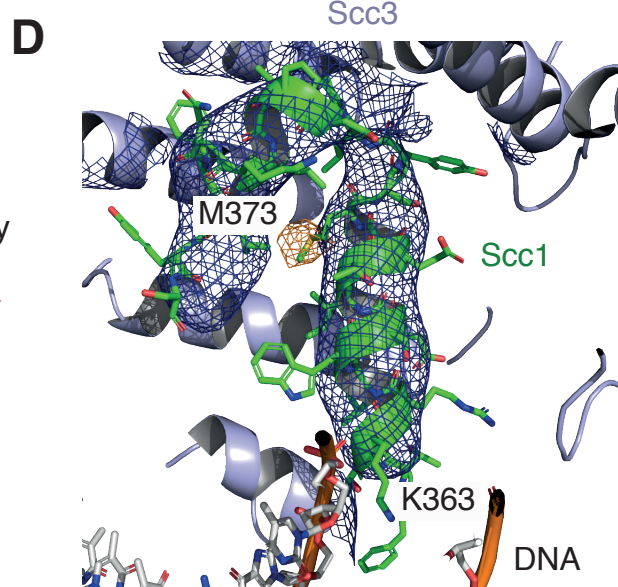

Supplement: supp [file elife-38356-supp-v1.zip]

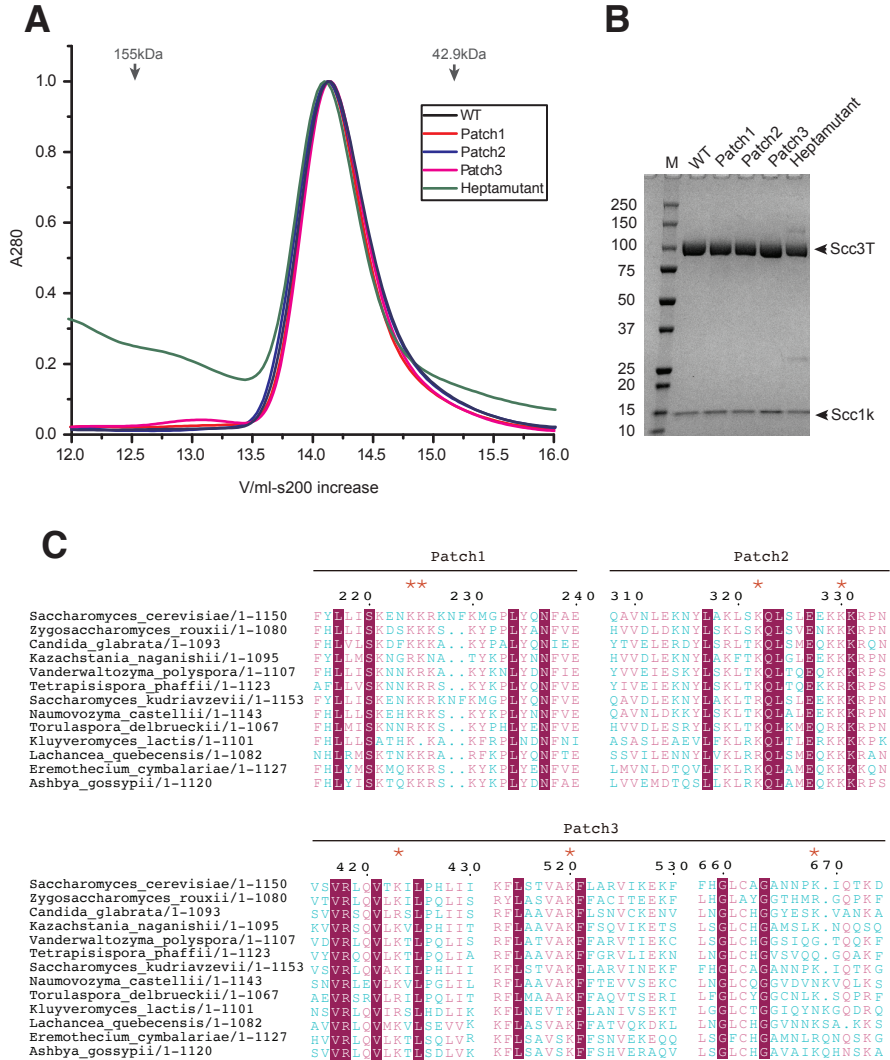

Supplement: supp [file elife-38356-supp-v1.zip]

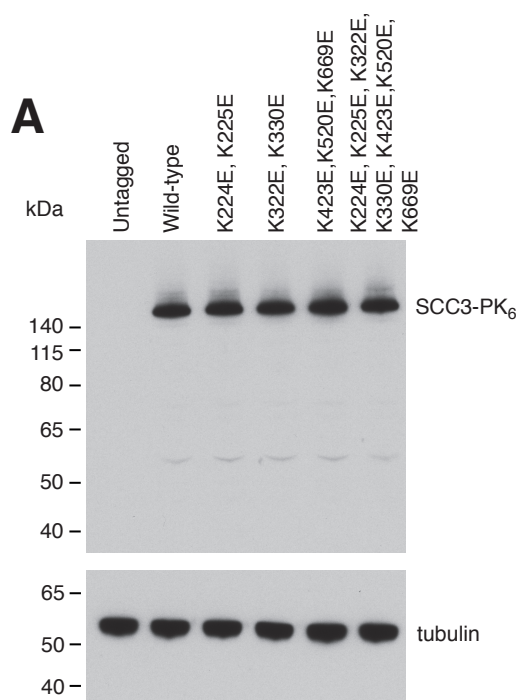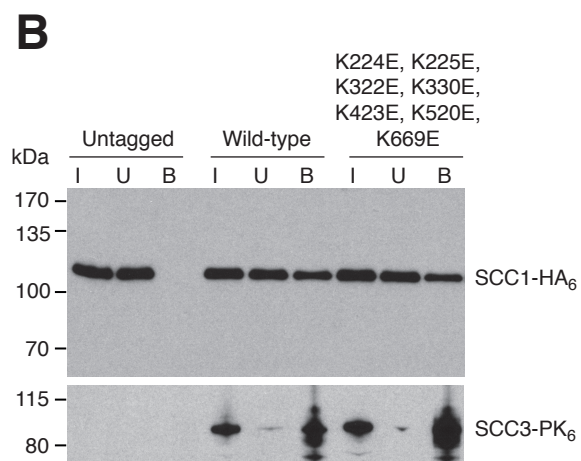

Supplement: supp [file elife-38356-supp-v1.zip]

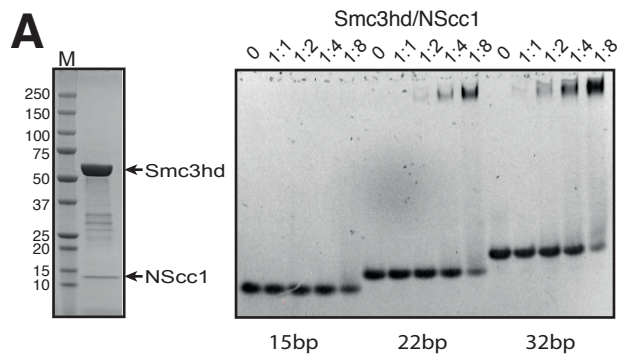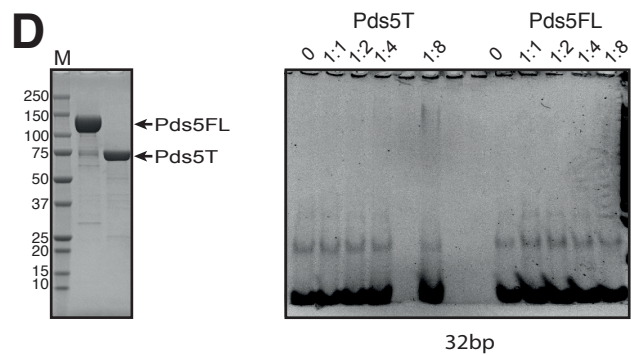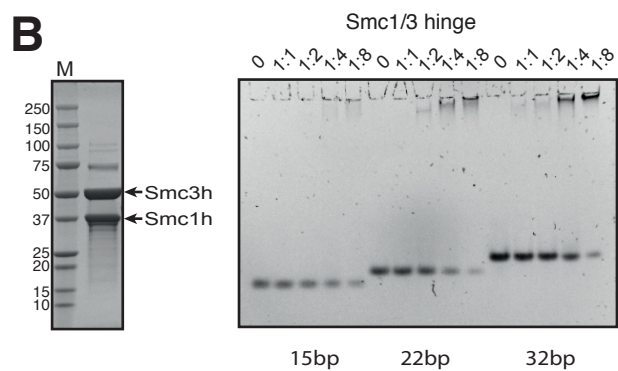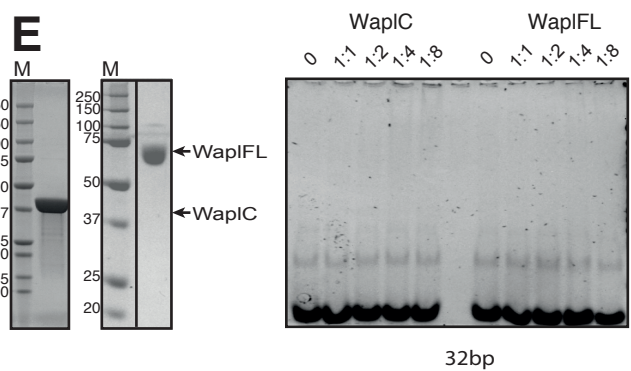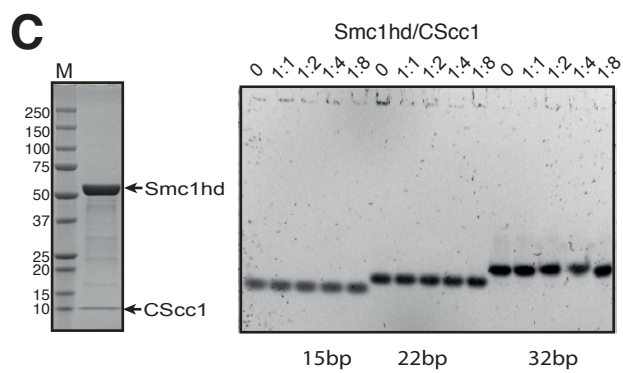

Supplement: supp [file elife-38356-supp-v1.zip]
